# Supplementary material
Source: publisher site journal article supplement (https://www.spandidos-publications.com/6088/downloadSupplementary)

Figure S1. OCTA results. (A-D) The OCTA of the right eye: (A) The superficial vascular complex, (B) the deep vascular complex, (C) the avascular layer and (D) the laminae choriocapillaris, which were distributed normally, without malformation, hemangioma, neovascularization and non-perfusion areas. (E-H) The OCTA of the left eye: (E) The superficial vascular complex, (F) the deep vascular complex, (G) the avascular layer and (H) the laminae choriocapillaris, which were distributed normally, without malformation, hemangioma, neovascularization and non-perfusion areas. OCTA, optical coherence tomography angiography.

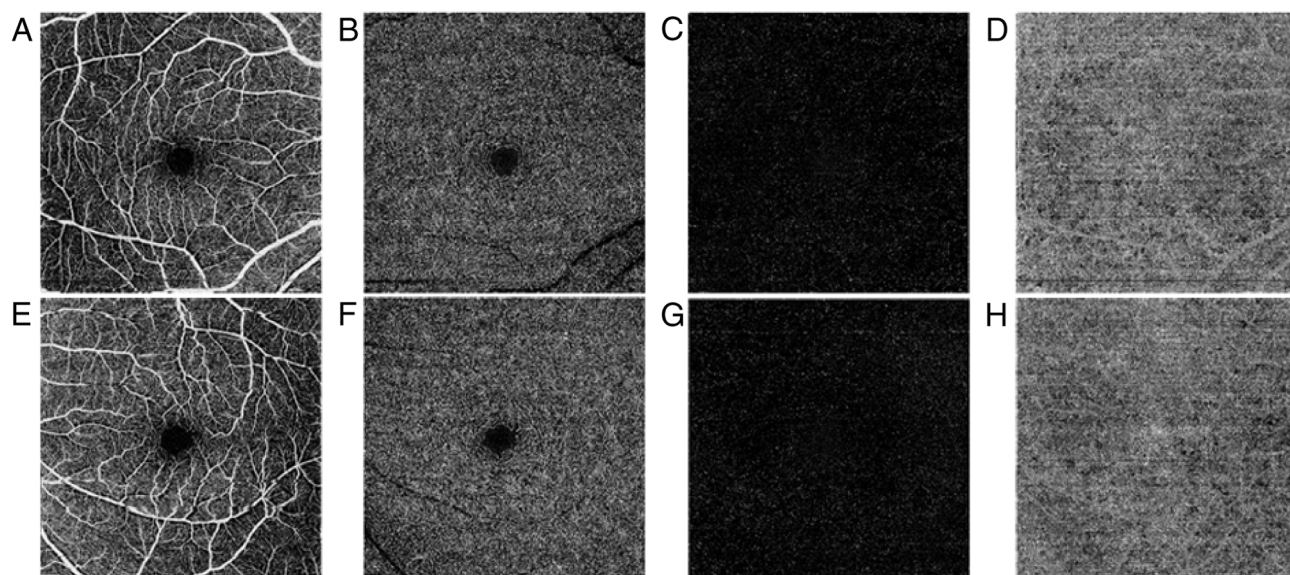

Supplement: Supplementary file 1 [file downloadSupplementary]
